# Including phenotypic causal networks in genome-wide association studies using mixed effects structural equation models

**Running Head:** Structural equation modeling for association studies

Mehdi Momen<sup>1</sup>, Ahmad Ayatollahi Mehrgardi<sup>1\*</sup>, Mahmoud Amiri Roudbar<sup>1</sup>, Andreas Kranis<sup>2</sup>, Renan Mercuri Pinto<sup>3,4</sup>, Bruno D. Valente<sup>4</sup>, Gota Morota<sup>5</sup>, Guilherme J. M. Rosa<sup>4,6</sup>, Daniel Gianola<sup>4,6,7</sup>

<sup>1</sup> Department of Animal Science, Faculty of Agriculture, Shahid Bahonar University of Kerman (SBUK), Kerman, Iran

<sup>2</sup> Roslin Institute, University of Edinburgh, Midlothian, UK, EH25 9PS

<sup>3</sup> Department of Exact Sciences, University of São Paulo - ESALQ, Piracicaba-SP, Brazil

<sup>4</sup> Department of Animal Sciences, University of Wisconsin, Madison, WI, USA

<sup>5</sup> Department of Animal Science, University of Nebraska-Lincoln, Lincoln, Nebraska, USA

<sup>6</sup> Department of Biostatistics and Medical Informatics, University of Wisconsin, Madison, WI, USA

<sup>7</sup> Department of Dairy Science, University of Wisconsin, Madison, WI, USA

\*Corresponding author: mehrgardi@uk.ac.ir

Email addresses:

MM: momenmehdi@yahoo.com

AAM: mehrgardi@uk.ac.ir

MA: mahmoud.amiri225@gmail.com

GM: morota@unl.edu

AK: andreas.kranis@roslin.ed.ac.uk

RMP: rpinto@wisc.edu

BDV: bvalente@wisc.edu

GJMR: grosa@wisc.edu

DG: gianola@ansci.wisc.edu

## 31 **Abstract**

### 32 **Background**

33 Phenotypic networks describing putative causal relationships among multiple phenotypes can be  
34 used to infer single-nucleotide polymorphism (SNP) effects in genome-wide association studies  
35 (GWAS). In GWAS with multiple phenotypes, reconstructing underlying causal structures among  
36 traits and SNPs using a single statistical framework is essential for understanding the entirety of  
37 genotype-phenotype maps. A structural equation model (SEM) can be used for such purposes.

### 38 **Methods**

39 We applied SEM to GWAS (SEM-GWAS) in chickens, taking into account putative causal  
40 relationships among body weight (BW), breast meat (BM), hen-house production (HHP), and  
41 SNPs. We assessed the performance of SEM-GWAS by comparing the model results with those  
42 obtained from traditional multi-trait association analyses (MTM-GWAS).

### 43 **Results**

44 Three different putative causal path diagrams were inferred from highest posterior density (HPD)  
45 intervals of 0.75, 0.85, and 0.95 using the inductive causation algorithm. A positive path coefficient  
46 was estimated for  $BM \rightarrow BW$ , and negative values were obtained for  $BM \rightarrow HHP$  and  $BW \rightarrow HHP$   
47 in all implemented scenarios. Further, the application of SEM-GWAS enabled the decomposition  
48 of SNP effects into direct, indirect, and total effects, identifying whether a SNP effect is acting  
49 directly or indirectly on a given trait. In contrast, MTM-GWAS only captured overall genetic  
50 effects on traits, which is equivalent to combining the direct and indirect SNP effects from SEM-  
51 GWAS.

## 52 **Conclusions**

53 Although MTM-GWAS and SEM-GWAS use the same probabilistic models, we provide evidence  
54 that SEM-GWAS captures complex relationships and delivers a more comprehensive  
55 understanding of SNP effects compared to MTM-GWAS. Our results showed that SEM-GWAS  
56 provides important insight regarding the mechanism by which identified SNPs control traits by  
57 partitioning them into direct, indirect, and total SNP effects.

58 **Key words:** Causal structure, GWAS, multiple traits, path analysis, SEM, SNP effect

59

## 60 **Background**

61 Genome-wide association studies (GWAS) have become a standard approach for investigating  
62 relationships between common genetic variants in the genome (e.g., single-nucleotide  
63 polymorphisms, SNPs) and phenotypes of interest in human, plant, and animal genetics [1-4]. A  
64 typical GWAS is based on univariate linear or logistic regression of phenotypes on genotypes for  
65 each SNP individually while often adjusting for the presence of nuisance covariates [5]. A  
66 statistically significant association indicates that SNPs may be in strong linkage disequilibrium  
67 (LD) with quantitative trait loci (QTLs) that contribute to the trait etiology. Alternatively, multi-  
68 trait model GWAS (MTM-GWAS) can be used to test for genetic associations among a set of traits  
69 [6-8]. It has been established that MTM-GWAS reduces false positives and increases the statistical  
70 power of association tests, explaining the recent popularity of this method. MTM-GWAS can be  
71 used to study genetic associations of multiple traits; however, it does not identify factors that  
72 mediate relationships between the detected effects and dependencies involving complex traits.

73 Complex traits are the product of various cryptic biological signals that may affect a trait of interest  
74 either directly or indirectly through other intermediate traits [9]. A standard regression cannot  
75 describe such complex relationships between traits and QTLs properly. For instance, some traits  
76 may simultaneously act as both dependent and independent variables. Structural equation modeling  
77 (SEM) is an extended version of Wright's path analysis [10, 11] that offers a powerful technique  
78 for modeling causal networks. In a complex genotype-phenotype setting involving many traits, a  
79 given trait can be influenced not only by genetic and systematic factors but also by other traits (as  
80 covariates) as well. Here, QTLs may not affect the target trait directly; instead, the effects may be  
81 mediated by upstream traits in a causal network. Indirect effects may therefore constitute a  
82 proportion of perceived pleiotropy, and these concepts apply to sets of heritable traits, organized  
83 as networks, that are common in biological systems. An example from dairy cattle production  
84 systems, described by Gianola and Sorensen [11], is that higher milk yield increases the risk of a  
85 particular disease, such as mastitis, while the prevalence of the disease may negatively affect milk  
86 yield. As another example, Varona, et al. [12] explored a causal link from litter size to average  
87 piglet weight in two pig breeds. In humans, obesity is a key factor influencing insulin resistance,  
88 which subsequently causes type 2 diabetes. Lists of causal networks across human diseases and  
89 candidate genes are described in Kumar and Agrawal [13] and Schadt [14].

90 Although MTM-GWAS is a valuable approach, it only captures correlations or associations among  
91 traits and does not provide information about causal relationships. Knowledge of the causal  
92 structures underlying complex traits is essential, as correlation does not imply causation. For  
93 example, a correlation between two traits, T1 and T2, could be attributed to a direct effect of T1  
94 on T2 or T2 on T1, or to additional variables that jointly influence both traits [15]. Likewise, if we  
95 know a "causal" SNP is linked to a QTL, we can imagine three possible scenarios: 1) causal

96 ( $SNP \rightarrow T1 \rightarrow T2$ ), 2) reactive ( $SNP \rightarrow T2 \rightarrow T1$ ), or 3) independent ( $T1 \leftarrow SNP \rightarrow T2$ ).  
97 Scenarios (1) and (2) do not cause pleiotropy but produce association.  
98 A SEM methodology has the ability to handle complex genotype-phenotype maps in GWAS,  
99 placing an emphasis on causal networks [16]. Therefore, SEM-based GWAS (SEM-GWAS) may  
100 provide a better understanding of biological mechanisms and of relationships among a set of traits  
101 than MTM-GWAS. SEM can potentially decompose the total SNP effect on a trait into direct and  
102 indirect (i.e., mediated) contributions. However, SEM-derived GWAS has yet not been discussed  
103 or applied fully in quantitative genetic studies yet. Our objective was to illustrate the potential  
104 utility of SEM-GWAS by using three production traits in broiler chickens genotyped for a battery  
105 of SNPs as a case example.

## 106 **Methods**

### 107 **Data set**

108 The analysis included records for 1,351 broiler chickens provided by Aviagen Ltd. (Newbridge,  
109 Scotland) for three phenotypic traits: body weight (BW), ultrasound of breast muscle (BM) at 35  
110 days of age, and hen-house egg production (HHP), defined as the total number of eggs laid between  
111 weeks 28 and 54 per bird. The sample consisted of 274 full-sib families, 326 sires, and 592 dams.  
112 More details regarding population and family structure were provided by Momen, et al. [17]. A  
113 pre-correction procedure was performed on the phenotypes to account for systematic effects such  
114 as sex, hatch week, pen, and contemporary group for BW, BM, and HHP.

115 Each bird was genotyped for 580,954 SNP markers with a 600k Affymetrix SNP [18] chip  
116 (Affymetrix, Inc., Santa Clara, CA, USA). The Beagle software program [19] was used to impute  
117 missing SNP genotypes, and quality control was performed using PLINK version 1.9 [20]. After

118 removing markers that did not fulfill the criteria of minor allele frequencies  $< 1\%$ , call rate  $> 95\%$ ,  
119 and Hardy–Weinberg equilibrium (Chi-square test p-value threshold was  $10^{-6}$ ), 354,364 autosomal  
120 SNP markers were included in the analysis.

## 121 **Multiple-trait model for GWAS**

122 MTM-GWAS is a single-trait GWAS model extended to multi-dimensional responses. When only  
123 considering additive effects of SNPs, the phenotype of a quantitative trait using the single-trait  
124 model can be described as:

$$125 \quad y_i = \sum_{q=1}^k x_{iq}\beta_q + w_{ij}s_j + e_i \quad (1)$$

126 where  $y_i$  is the phenotypic trait of individual  $i$ ,  $x_{iq}$  is the incidence value for the  $i$ th phenotype in  
127 the  $q$ th level of systematic environmental effects,  $\beta_q$  is the fixed effect of the  $q$ th systemic  
128 environmental effect on the trait,  $w_j = (w_1, \dots, w_p)$  is the number of A alleles (i.e.,  $w_j \in \{0,1,2\}$ )  
129 in the genotype of SNP marker  $j$ , and  $s_j$  is the allele substitution effect for SNP marker  $j$ . Strong  
130 LD between markers and QTLs coupled with an adequate marker density increases the chance of  
131 detecting marker and phenotype associations. Hypothesis testing is typically used to evaluate the  
132 strength of the evidence of a putative association. Typically, a  $t$ -test is applied to obtain p-values,  
133 and the statistic is  $T_{ij} = \hat{s}_j/se(\hat{s}_j)$ , where  $\hat{s}$  is the point estimate of the  $j$ th SNP effect and  $se(\hat{s}_j)$  is  
134 its standard error.

135 The single locus model described above is naïve for a complex trait because the data typically  
136 contain hidden population structure and individuals have varying degrees of genetic similarity [21,  
137 22]. Therefore, accounting for covariance structure induced by genetic similarity is expected to

138 produce better inferences [23]. Ignoring effects that reveal genetic relatedness inflates the residual  
139 terms and compromises the ability to detect association. A random effect  $g_i$ , including a covariance  
140 matrix reflecting pairwise similarities between additive genetic effects of individuals, can be  
141 included to control population stratification. The similarity metrics can be derived from pedigree  
142 information or from whole-genome marker genotypes. This model, extended for analysis of  $t$  traits,  
143 is given by:

144

$$145 \quad y_{il} = \sum_{q=1}^k x_{iq}\beta_{ql} + w_{ij}s_{jl} + g_{il} + e_{il} \quad (2)$$

146 for  $i = 1, 2, \dots, n$ ,  $l = 1, 2, \dots, t$ . In this extension,  $y_{il}$  is the phenotypic value of the  $l$ th trait for the  
147  $i$ th subject,  $\beta_{qj}$  is the systematic effect of the  $q$ th environmental factor  $x_{iq}$  on the  $l$ th trait,  $s_{jl}$  is the  
148 additive effect of the  $j$ th marker on the  $l$ th trait,  $w_{ij}$  is as previously defined, and  $g_{il}$  and  $e_{il}$  are  
149 the random polygenic effect and model residual assigned to individual  $i$  for trait  $l$ , respectively.

150 Random effects within a trait follow the multivariate normal distribution,

$$151 \quad \begin{bmatrix} g_l \\ e_l \end{bmatrix} \sim N \left( \begin{bmatrix} \mathbf{0} \\ \mathbf{0} \end{bmatrix}, \begin{bmatrix} \mathbf{K}\sigma_{g_l}^2 & \mathbf{0} \\ \mathbf{0} & \mathbf{I}\sigma_{e_l}^2 \end{bmatrix} \right), \text{ where } \mathbf{K} \text{ is a genetic relationship matrix, } \sigma_{g_l}^2 \text{ is the additive genetic}$$

152 variance of trait  $l$ ,  $\mathbf{I}$  is an identity matrix, and  $\sigma_{e_l}^2$  is the residual variance for trait  $l$ . The multiple-  
153 trait model accounts for the additive genetic ( $\rho_{ll'}$ ) and residual correlation ( $\lambda_{ll'}$ ) between a pair of  
154 traits  $l$  and  $l'$ .

155 The positive definite matrix  $\mathbf{K}$  may be a genomic relationship matrix ( $\mathbf{G}$ ) computed from marker  
156 data, or a pedigree-based matrix ( $\mathbf{A}$ ) computed from genealogical information. The  $\mathbf{A}$  matrix  
157 describes the expected additive similarity among individuals, while  $\mathbf{G}$  measures the realized

158 fraction of alleles shared. Genomic relationship matrices can be derived in several ways [24-26].  
159 Here, we used the form proposed by VanRaden 2008 [24]:

$$160 \quad \mathbf{G} = \frac{\mathbf{M}\mathbf{M}'}{2 \sum p_j q_j} \quad (3)$$

161 where  $\mathbf{M}$  is an  $n \times p$  matrix of centered SNP genotypes and  $p_j$  and  $q_j = 1 - p_j$  are the allele  
162 frequencies at marker locus  $j$ . We evaluated both  $\mathbf{A}$  and  $\mathbf{G}$  in the present study.

163

### 164 **Structural equation model association analysis**

165 A SEM consists of two essential parts: a measurement model and a structural model. The  
166 measurement model depicts the connections between observable variables and their corresponding  
167 latent variables. The measurement model is also known as confirmatory factor analysis. The critical  
168 part of a SEM is the structural model, which can have three forms. The first consists of observable  
169 exogenous and endogenous variables. This model is a restricted version of a SEM known as path  
170 analysis [10]. The second form explains the relationship between exogenous and endogenous  
171 variables that are only latent. The third type is a model consisting of both manifest and latent  
172 variables.

173 SEM can be applied to GWAS as an alternative to MTM-GWAS to study how different causal  
174 paths mediate SNP effects on each trait. The following SEM model was considered:

$$175 \quad y_{il} = \mu_l + \sum_{m \in C} y_m \lambda_{lm} + w_{j(l)} S_{j(l)} + g_{il} + \varepsilon_{il} \quad (4)$$

176 where  $C$  is the set of phenotypic traits that directly affect the trait  $l$ ,  $\lambda_{lm}$  is a structural coefficient  
177 representing the effect of trait  $m$  on trait  $l$ , and  $g_l \sim N(0, \mathbf{K}\sigma_l^2)$  is the polygenic effect of the  $l$ th trait.

178 The remaining terms are as presented earlier with one important difference: the SNP effects are not



179 interpreted as overall effects on trait  $l$  but instead represent direct effects on trait  $l$ . Additional  
180 indirect effects from the same SNP may be mediated by phenotypic traits in  $C$ . Each marker is  
181 entered into equation (4) one at a time, and its significance is tested. For a discussion of how SEM  
182 represents genetic signals on each trait through multiple causal paths, see Wu et al. [27] and  
183 Jamrozik and Schaeffer [28]. Despite the difference in interpretation, the distribution of the vector  
184 of polygenic effects is assumed to be the same as in the MTM-GWAS model. The same applies to  
185 residual terms within a trait. We also consider trait-specific residuals to be independent within an  
186 individual. This restriction is required to render structural coefficients likelihood-identifiable. In  
187 addition, the interpretation of inferences as having a causal meaning requires imposing the  
188 restriction that the residuals' joint distribution be interpreted as the causal sufficiency assumption  
189 [29]. In the present study, all exogenous and endogenous variables were observable, and there was  
190 no latent variable. Hence, causal structure was assumed between the endogenous variables BM,  
191 BW, and HHP.

192 We considered the following GWAS models, which their causal structures were recovered by the  
193 inductive causation (IC) algorithm [29]: (1) MTM-GWAS with pedigree-based kinship  $\mathbf{A}$  (MTM-  
194  $\mathbf{A}$ ) or marker-based kinship  $\mathbf{G}$  (MTM-G), and (2) SEM-GWAS with  $\mathbf{A}$  (SEM-A) or  $\mathbf{G}$  (SEM-G).  
195 Although nuisance covariates such as environmental factors can be omitted in the graph, they may  
196 be incorporated into the models as exogenous variables. The SEM representation allowed us to  
197 decompose SNP effects into direct, indirect, and total effects.

198 A direct SNP effect is the path coefficient between a SNP as an exogenous variable and a dependent  
199 variable without any causal mediation by any other variable. The indirect effects of a SNP are those  
200 mediated by at least one other intervening endogenous variable. Indirect effects are calculated by  
201 multiplying path coefficients for each path linking the SNP to an associated variable, and then

202 summing over all such paths [30]. The overall effect is the sum of all direct and indirect effects.  
203 By explicitly accounting for complex relationship structure among traits in such a way, SEM  
204 provides a better understanding of a genome-wide SNP analysis by allowing us to decompose  
205 effects into direct, indirect, and overall effects within a predefined casual framework [31]. MTM-  
206 GWAS and SEM-GWAS were compared with the logarithm of the likelihood function ( $\log L$ ),  
207 Akaike's Information Criterion (AIC), and the Bayesian Information Criterion (BIC). The model  
208 providing the lowest values for these information criteria is considered to fit the data better [27].  
209 MTM-GWAS and SEM-GWAS were fitted using the SNP Snappy strategy, which is implemented  
210 in the Wombat software program [32].

### 211 **Searching for a phenotypic causal network in a mixed model**

212 In the SEM-GWAS formulation described earlier, the structure of the underlying causal phenotypic  
213 network needs to be known. Because this is not so in practice, we used a causal inference algorithm  
214 to infer the structure. Residuals are assumed to be independent in all SEM analyses, so associations  
215 between observed traits are viewed as due to causal links between traits and by correlations among  
216 genetic values (i.e.,  $g_1$ ,  $g_2$ , and  $g_3$ ). Thus, to eliminate confounding problems when inferring the  
217 underlying network among traits, we used the approach of Valente, et al. [32] to search for acyclic  
218 causal structures through conditional independencies on the distribution of the phenotypes, given  
219 the genetic effects. A causal phenotypic network was inferred in two stages: 1) an MTM model  
220 [33] was employed to estimate covariance matrices of additive genetic effects and of residuals, and  
221 2) the causal structure among phenotypes from the covariance matrix between traits, conditionally  
222 on additive genetic effects, was inferred by the IC algorithm. The residual (co)variance matrix was  
223 inferred using Bayesian Markov-chain Monte Carlo [27, 32], with samples drawn from the  
224 posterior distribution. The reason for our use of the residual (co)covariances is that the residual

225 structure could bear information from the joint distribution of all phenotypic traits conditional on  
226 their polygenic effects, such that they correct the confounding issues caused by such effects when  
227 the traits are genetically correlated [29]. For each query testing statistical independence between  
228 traits  $y_l$  and  $y_{l'}$ , the posterior distribution of the residual partial correlation  $\rho_{y_l, y_{l'} | S}$  was obtained,  
229 where  $S$  is a set of variables (traits) that are independent. Three highest posterior density (HPD)  
230 intervals of 0.75, 0.85, and 0.95 were used to make statistical decisions for SEM-GWAS. We thus  
231 considered SEM-A75 (HPD > 0.75), SEM-A85 (HPD > 0.85), SEM-A95 (HPD > 0.95), and SEM-  
232 G75 (HPD > 0.75). An HPD interval that does not contain zero declares  $y_l$  and  $y_{l'}$  to be  
233 conditionally dependent.

## 234 Results

235 Figure 1 shows phenotypic relationship structures recovered by the IC algorithm for the three  
236 different HPD intervals. Edges connecting two traits represent non-null partial correlations as  
237 indicated by HPD intervals. We compared the two MTM-GWAS and four SEM-GWAS by using  
238 the three chicken traits (BW, BM, and HHP). Only causal structures among the three traits are  
239 shown in Figure 1, because other parts were the same across the different SEM models. Fully  
240 recursive SEM-A75 and SEM-G75 revealed direct effects of BM on BW and HHP, and those of  
241 BW on HHP, as well as an indirect effect of BM on HHP. In addition, SEM-A85 detected a direct  
242 effect of BM on BW, the direct effect of BW on HHP, and the indirect effect of BM on HHP  
243 mediated by BW. Finally, SEM-A95 only identified a direct effect of BM on BW because of a  
244 statistically stringent HPD cutoff imposed.

245 Given the causal structures inferred from the IC algorithm, the following SEM was fitted:

$$246 \begin{cases} \mathbf{y}_1 = \mu + \mathbf{Z}_i \mathbf{g}_1 + W_{ij} S_j + \boldsymbol{\varepsilon}_i \\ \mathbf{y}_2 = \mu + \lambda_{21} \mathbf{y}_1 + \mathbf{Z}_i \mathbf{g}_2 + W_{ij} S_j + \boldsymbol{\varepsilon}_i \\ \mathbf{y}_3 = \mu + \lambda_{31} \mathbf{y}_1 + \lambda_{32} \mathbf{y}_2 + \mathbf{Z}_i \mathbf{g}_3 + W_{ij} S_j + \boldsymbol{\varepsilon}_i \end{cases} \quad (5)$$

247 Note that only a small number of the entries in the structural coefficient matrix ( $\lambda$  in equation 5)  
248 are nonzero due to sparsity. These nonzero entries specify the effect of one phenotype on other  
249 phenotypes. The corresponding directed acyclic graph is shown in Figure 2 assuming the causal  
250 relationships among the three traits, where  $y_1$ ,  $y_2$ , and  $y_3$  represent BM, BW, and HHP,  
251 respectively;  $SNP_j$  is the genotype of the  $j$ th SNP;  $S_{jl}$  is the direct SNP effect on trait  $l$ ; and the  
252 remaining variables are as presented earlier. This diagram depicts a fully recursive structure in  
253 which all recursive relationships among the three phenotypic traits are shown. Arrows represent  
254 causal connections, whereas double-headed arrows between polygenic effects are correlations.

255 << **Figure 1 about here**>>

256 << **Figure 2 about here**>>

257 We examined the fit of each model implemented to assess how well it describes the data (Table 1).  
258 Varona, et al. [12] and recently Valente, et al. [34] showed that re-parametrization and reduction  
259 of a SEM mixed model yield the same joint probability distribution of observation as in MTM,  
260 suggesting that the expected likelihood of SEM and MTM should be the same. As expected, SEM-  
261 GWAS and MTM-GWAS showed very similar results (e.g., SEM-A75 vs. MTM-A and SEM-G75  
262 vs. MTM-G). Among the models considered, those involving  $\mathbf{G}$  exhibited slightly better fits. SEM-  
263 A85 and SEM-A95, sharing a subset of the SEM-A75 structure, presented almost identical AIC  
264 and BIC values. Since these results imply that the recursive model and standard mixed model for  
265 GWAS are statistically equivalent in terms of the fitting criteria, the focus of the remainder of the

266 analysis will be on the modeling of SNP (or QTL) effects in the SEM context as an extension of  
267 MTM, which accounts for recursive links among the three measured traits.

268

269 <<Table 1 about here>>

## 270 **Structural coefficients**

271 Table 2 presents the causal structural path coefficients for endogenous variables (BM, BW, and  
272 HHP). All models have positive effects for BM→BW, whereas the BM→HHP and BW→HHP  
273 relationships have negative path coefficients. The latter confirmed the fact that chicken breeding is  
274 divided into broiler and layer sections due to the negative genetic correlation between BW and  
275 HHP.

276 <<Table 2 about here>>

277 Also shown in Table 2 are the magnitudes of the SEM structural coefficient reflecting the intensity  
278 of the causality. The positive coefficient  $\lambda_{21}$  quantifies the (direct) causal effect of BM on BW.  
279 This suggests that a 1-unit increase in BM results in a  $\lambda_{21}$ -unit increase in BW. Likewise, the  
280 negative causal effects  $\lambda_{31}$  and  $\lambda_{32}$  offer the same interpretation.

## 281 **Decomposition of SNP effect paths using a fully recursive model**

282 We can decompose SNP effects into direct and indirect effects using Figure 2. The direct effect of  
283 the SNP  $j$  on  $y_3$  (HHP) is given by  $d_{SNP_j \rightarrow y_3} : \hat{S}_{j(y_3)}$ , where  $d$  denotes the direct effect. Note there  
284 are only one direct and many indirect paths. We find three indirect paths from  $SNP_j$  to  $y_3$  mediated  
285 by  $y_1$  and  $y_2$  (i.e., the nodes formed by other traits). The first indirect effect is  $ind_{(1)SNP_j \rightarrow y_3} :$   
286  $\lambda_{32}(\lambda_{21}\hat{S}_{j(y_1)})$  in the path mediated by  $y_1$  and  $y_2$ , where  $ind$  denotes the indirect effect. The second

287 indirect effect  $ind_{(2)SNP_j \rightarrow y_3} : \lambda_{32}\hat{S}_{j(y_2)}$ , is mediated by  $y_2$ . The last indirect effect, is  
 288  $ind_{(3)SNP_j \rightarrow y_3} : \lambda_{31}\hat{S}_{j(y_1)}$ , mediated by  $y_1$ . Therefore, the overall effect is given by summing all four  
 289 paths,  $T_{SNP_j \rightarrow y_3} : \lambda_{32}(\lambda_{21}\hat{S}_{j(y_1)}) + \lambda_{32}\hat{S}_{j(y_2)} + \lambda_{31}\hat{S}_{j(y_1)} + \hat{S}_{j(y_3)}$ . The fully recursive model of the  
 290 overall SNP effect is then:

$$291 \quad \begin{cases} T_{\hat{S}_{j \rightarrow y_1} : \hat{S}_{j(y_1)}} \\ T_{\hat{S}_{j \rightarrow y_2} : \lambda_{21}(\hat{S}_{j(y_1)}) + \hat{S}_{j(y_2)}} \\ T_{\hat{S}_{j \rightarrow y_3} : \lambda_{32}[\lambda_{21}(\hat{S}_{j(y_1)}) + \hat{S}_{j(y_2)}] + \lambda_{31}(\hat{S}_{j(y_1)}) + \hat{S}_{j(y_3)}} \end{cases} \quad (6)$$

292 For  $y_1$  (BM), there is only one effect, so the overall effect is equal to the direct effect. For  $y_2$  (BW)  
 293 and  $y_3$  (HHP), direct and indirect SNP effects are involved. There are two paths for  $y_2$ : one  
 294 indirect,  $ind_{S_j \rightarrow y_2} : \hat{S}_{j(y_1)} \rightarrow y_1 \rightarrow y_2$ , and one direct,  $d_{S_j \rightarrow y_2} : \hat{S}_{j(y_2)} \rightarrow y_2$ . Here, the SNP effect is  
 295 direct and mediated thorough other phenotypes according to causal networks in SEM-GWAS  
 296 (Figures 1 and 2). For instance, the overall SNP effect for  $y_3$  into four direct and indirect paths is  
 297  $T_{\hat{S}_{j \rightarrow y_3}} : \lambda_{32}\lambda_{21}\hat{S}_{j(y_1)} + \lambda_{32}\hat{S}_{j(y_2)} + \lambda_{31}\hat{S}_{j(y_1)} + \hat{S}_{j(y_3)}$ .

298 The scatter plots in Figure 3 compare the estimated total effects for HHP ( $T_{\hat{S}_{j \rightarrow y_3}}$ ) obtained from  
 299 SEM-GWAS and those from MTM-GWAS. We observed good agreement between SEM-GWAS  
 300 and MTM-GWAS. The total SNP signals derived from SEM and MTM are the same but SEM  
 301 provides biologically relevant additional information.

302 <<Figure 3 about here>>

303 Supplementary Figures S1–S4 present scatter plots of MTM-GWAS and SEM-GWAS signals  
 304 (SEM-A75, SEM-G75, SEM-A85, and SEM-A95) for the  $BM \rightarrow BW$  path, which was a common  
 305 path across all SEM-GWAS considered. These two traits have a genetic correlation of 0.5 (results  
 306 not shown). We partitioned the SEM causal link into direct, indirect, and overall effects based on

307 directed links inferred from the IC algorithm with HPD > 0.85, whereas MTM-GWAS captures an  
308 overall SNP effect on BW. Scatter plots of the overall effects from SEM-GWAS and those of the  
309 total effects from MTM-GWAS indicated almost perfect agreement (top left plots, Supplementary  
310 Figures S1–S4). We also observed concomitance between estimated overall and direct effects (top  
311 right plots, Supplementary Figures S1–S4). In contrast, there was less agreement in the magnitude  
312 of the SNP effects when comparing overall vs. indirect effects (bottom left plots, Supplementary  
313 Figures S1–S4). There was no linear relationship between the indirect and direct SNP effects  
314 (bottom right plots, Supplementary Figures S1–S4). In short, genetic signals detected in SEM-  
315 GWAS were close to those of MTM-GWAS for overall effects because both models are based on  
316 a multivariate approach with the same covariance matrix. In all SEM-GWAS, results showed that  
317 direct effects contributed to overall effects more than the indirect effects.

### 318 **Manhattan plot of direct, indirect, and overall SNP effects**

319 Figure 4 depicts a Manhattan plot summarizing the magnitude of direct (SEM-75A), indirect  
320 (SEM-75A), and overall SNP effects (MTM-75A). We plotted the decomposed SNP effects on  
321 BW along chromosomes to visualize estimated marker effects from SEM-GWAS and MTM-  
322 GWAS. The indirect and direct effects provide a view of SNP effects from a perspective that is not  
323 available for the total effect of MTM-GWAS. For instance, many pleiotropic QTLs have positive  
324 direct effects on BW but negative effects on BM. There were two estimated SNP effects on  
325 chromosomes 1 and 2 that deserve particular attention. These two SNPs are highlighted with black  
326 circles and red ovals. The overall effect of the first SNP consisted of large indirect and small direct  
327 effects on BM, whereas the opposite pattern was observed for the second SNP, which showed large  
328 direct and small indirect effects. Although the overall effects of these SNPs were similar (top  
329 Manhattan plot, Figure 4), use of decomposition allowed us to determine that the trait of interest is

330 affected in different manners: the second SNP effect acted directly on BW without any mediation  
331 by BM, whereas the first SNP reflected a large effect mediated by BM on BW. Collectively, new  
332 insight regarding the direction of SNP effects can be obtained using the SEM-GWAS methodology.  
333 The corresponding Manhattan plot based on  $-\log_{10}$  (p-values) is shown in Supplementary Figure  
334 S5. As with the magnitude of effect sizes, the results showed that  $-\log_{10}$  (p-values) of estimated  
335 overall effects from SEM-A75 and those from MTM-A75 yielded the same significant peaks. We  
336 found that some significant indirect SNP effects reached genome-wide significance after correction  
337 for multiple-testing using a 5% FDR threshold level (2.752). The most significant SNPs were on  
338 chromosomes 1 and 4 (GGA1 and GGA4).

339 <<Figure 4 about here>>

340 As an illustration, the six most significant SNPs with the highest  $-\log_{10}$  (p-values) for each type of  
341 decomposed SNP effect are presented in Table 3. Seven candidate genes were identified near the  
342 significant SNPs derived from the SNP effects decomposition, with two on GGA7 (*OLAI* and  
343 *ZNF385B*), one on GGA3 (*EPHA7*), three on GGA4 (*LOC422264*, *LOC422265*, and *MAEA*), and  
344 one on GGA14 (*GRIN2A*). We found that only genes on GGA4 and GGA1 are linked to significant  
345 indirect SNP effects that impact HHP. Some studies reported QTLs for BM on GGA1 and for BW  
346 on GGA4, stating that these genomic regions contain QTLs related to abdominal fat and growth  
347 traits that were detected across diverse chicken populations [35, 36]. One of the two detected genes  
348 on GGA14, i.e., *GRIN2A*, which was linked to the SNP Gga\_rs313620413, showed significant  
349 direct and overall SNPs effects using SEM as well as MTM. Collectively, Gga\_rs15390496,  
350 Gga\_rs16591372, and Gga\_rs313620413 SNPs on GGA3, GGA7, and GGA14, which were linked  
351 to *EPHA7*, *OLAI*, and *GRIN2A*, respectively, represent candidate genes identified from overall  
352 effects of both SEM and MTM (Table 3).



353 We noted that the six SNPs selected according to the  $-\log_{10}$  (p-values) from the direct effect on  
354 HHP (i.e.,  $d_{SNP_j \rightarrow y_{(HHP)}}$ ) had small indirect effects ranging from  $-0.9018$  to  $0.2983$ . These indirect  
355 effects were negligible compared with their corresponding direct and total effects. Also, exploring  
356 the indirect effect sizes of the six most significant SNPs showed that indirect effects that are  
357 transmitted from inferred causal networks have the ability to change the magnitude of overall SNP  
358 effects, even changing them to the opposite direction (i.e., from positive to negative or vice versa).

359 It should also be noted that the estimated additive SNP effects obtained from the four SEM-GWAS  
360 can be used for inferring pleiotropy. For instance, a pleiotropic QTL may have a large positive  
361 direct effect on BW but may exhibit a negative indirect effect coming from BM, which in turn  
362 reduces the total QTL effect on BW. Arguably, the methodology employed here would be most  
363 effective when the direct and indirect effects of a QTL are in opposite directions. If the direct and  
364 indirect QTL effects are in the same direction, the power of SEM-GWAS may be the same as the  
365 overall power of MTM-GWAS. The overall effect ( $T_{\hat{s}_j \rightarrow y_{(HHP)}}$ ) of a given SNP consisted of large  
366 indirect ( $ind_{\hat{s}_j \rightarrow y_{(HHP)}}$ ) and small direct ( $d_{\hat{s}_j \rightarrow y_{(HHP)}}$ ) effects on HHP, as observed for the top most  
367 significant indirect SNPs localized on GGA4 and GAA1, whereas the opposite pattern was  
368 observed for the most significant direct SNPs on GAA3, GGA7, and GGA14, which showed large  
369 direct and small indirect effects. Although the overall effects of these SNPs from SEM-GWAS and  
370 MTM-GWAS were similar, the use of decomposition allowed us to determine that the trait of  
371 interest is affected in different manners. For instance, a given SNP effect may largely act directly  
372 on HHP without any mediation by BM and BW, whereas another SNP may be transmitting a large  
373 effect through a causal path mediated by BM and BW. Collectively, new insight regarding the  
374 direction of SNP effects can be obtained using the SEM-GWAS methodology.

375

<<Table 3 about here>>

376

## 377 **Discussion**

378 It is becoming increasingly common to analyze a set of traits simultaneously in GWAS by  
379 leveraging genetic correlations between traits [37, 38]. In the present study, we illustrated the  
380 potential utility of a SEM-based GWAS approach for causal inference and mediation analysis of  
381 SNP effects, which has the potential advantage of embedding a pre-inferred causal structure across  
382 phenotypic traits [32]. SEM-GWAS, as an extension of standard MTM, accounts for recursive  
383 linking of mediating variables that could be either dependent or independent with restriction on a  
384 residual covariance. This is a useful approach when multiple mediators influence the final  
385 outcomes via either common or distinct biological pathways [39, 40]. SEM-GWAS is achieved by  
386 first inferring the structure of networks between phenotypic traits. For this purpose, we used a  
387 modified version of the IC algorithm described by Pearl [29] and modified for implementing in  
388 quantitative genetics by Valente, et al. [32]. The IC algorithm was used to explore putative causal  
389 links among phenotypes obtained from a residual covariance matrix, in a model that accounted for  
390 systematic and genetic confounding factors such as polygenic additive effects. It then produced a  
391 posterior distribution of partial residual correlations between any possible pairs of variables. Three  
392 different causal path diagrams were inferred from HPD intervals of 0.75, 0.85, and 0.95. We  
393 observed that the number of identified paths decreased with an increase in the HPD interval value.  
394 Only a path connecting BM and BW was present in all HPD intervals considered. Moreover, we  
395 found that the partial residual correlation between BM and HHP was weaker than that between BM

396 and BW. This may explain why the path between BM and HHP was not detected with HPD  
397 intervals larger than 0.75.

398 Estimated path coefficients reflect the strength of each causal link, quantifying the proportion of  
399 direct and indirect effects of a given SNP or genes on the outcome of interest via the mediator  
400 phenotypic traits or the predefined causal pathway between a set of mediators and the target  
401 outcome. For instance, a positive path coefficient from BM to BW suggests that a unit increase in  
402 BM directly results in an increase in BW. Our results showed that MTM-GWAS and SEM-GWAS  
403 were similar in terms of the goodness of fit as per the AIC and BIC criteria. This finding is in  
404 agreement with theoretical work of Gianola and Sorensen [11] and Varona, et al. [12] showing the  
405 equivalence between models. Thus, MTM-GWAS and SEM-GWAS produced the same marginal  
406 phenotypic distributions and goodness of fit values. A similar approach has been proposed by Li,  
407 et al. [16], Mi, et al. [41], and Wang and van Eeuwijk [42]. The main difference between our  
408 approach and theirs is that they used SEM in the context of standard QTL mapping, whereas our  
409 SEM-GWAS is developed for GWAS based on a linear mixed model.

410 The advantage of SEM-GWAS over MTM-GWAS is that the former decomposes SNP effects by  
411 tracing inferred causal networks. Our results showed that by partitioning SNP effects into direct,  
412 indirect, and total components, an alternative perspective of SNP effects can be obtained. As shown  
413 in Table 3 and Figure 4, direct and indirect effects may differ in magnitude and sign, acting in the  
414 same direction or in an antagonistic manner. Note that the total SNP effects inferred from SEM-  
415 GWAS were the same as the estimated SNP effects from MT-GWAS (Table 3). However,  
416 knowledge derived from the decomposition of SNP effects may be critical for animal and plant  
417 breeders in breaking unfavorable indirect QTL effects or obtaining better SNP effect estimates than  
418 those from MTM-GWAS [e.g., 41].

## 419 **Conclusion**

420 SEM offers insights into how phenotypic traits relate to each other. We illustrated potential  
421 advantages of SEM-GWAS relative to the commonly used standard MTM-GWAS by using three  
422 chicken traits as an example. SNP effects pertaining to SEM-GWAS have a different meaning than  
423 those in MTM-GWAS. Our results showed that SEM-GWAS enabled the identification of whether  
424 a SNP effect is acting directly or indirectly, i.e. mediated, on given trait. In contrast, MTM-GWAS  
425 only captures overall genetic effects on traits, which is equivalent to combining direct and indirect  
426 SNP effects from SEM-GWAS together. Thus, SEM-GWAS offers more information and provides  
427 an alternative view of putative causal networks, enabling a better understanding of the genetic  
428 quiddity of traits at the genomic level.

429

## 430 **Conflict of Interest**

431 The authors do not have any conflict of interest.

## 432 **Author's contributions**

433 MM carried out the study and wrote the first draft of the manuscript. GJMR and DG designed the  
434 experiment, supervised the study and critically contributed to the final version of manuscript. GM  
435 contributed to the interpretation of results, provided critical insights, and revised the manuscript.  
436 BDV and AAM participated in discussion and reviewed the manuscript. MA, AK and RMP  
437 contributed materials and revised the manuscript. All authors read and approved the final  
438 manuscript.

## 439 **Acknowledgment**

440 The first author wishes to acknowledge the Ministry of Science, Research and Technology of Iran  
441 for financially supporting his visit to the University of Wisconsin-Madison. Work was partially  
442 supported by the Wisconsin Agriculture Experiment Station under hatch grant 142-PRJ63CV to  
443 DG.

## 444 References

- 445 1. Hayes B, Goddard M, Genome-wide association and genomic selection in animal breeding This  
446 article is one of a selection of papers from the conference “Exploiting Genome-wide Association  
447 in Oilseed Brassicas: a model for genetic improvement of major OECD crops for sustainable  
448 farming”, *Genome*. 2010; 53: 876-883.
- 449 2. Brachi B, Morris G P, Borevitz J O, Genome-wide association studies in plants: the missing  
450 heritability is in the field, *Genome Biology*. 2011; 12: 232.
- 451 3. Wang H, Misztal I, Aguilar I, Legarra A, Muir W, Genome-wide association mapping including  
452 phenotypes from relatives without genotypes, *Genetics Research*. 2012; 94: 73-83.
- 453 4. Hayes B, Goddard M, Genome-wide association and genomic selection in animal breeding This  
454 article is one of a selection of papers from the conference “Exploiting Genome-wide Association  
455 in Oilseed Brassicas: a model for genetic improvement of major OECD crops for sustainable  
456 farming”, *Genome*. 2010; 53: 876-883.
- 457 5. Sikorska K, Lesaffre E, Groenen P F, Eilers P H, GWAS on your notebook: fast semi-parallel  
458 linear and logistic regression for genome-wide association studies, *BMC Bioinformatics*. 2013; 14:  
459 1-11.
- 460 6. Zhou X, Stephens M, Genome-wide efficient mixed-model analysis for association studies, *Nat*  
461 *Genet*. 2012; 44: 821-824.
- 462 7. Korte A, Vilhjálmsson B J, Segura V, Platt A, Long Q, Nordborg M, A mixed-model approach  
463 for genome-wide association studies of correlated traits in structured populations, *Nature genetics*.  
464 2012; 44: 1066-1071.
- 465 8. O’reilly P F, Hoggart C J, Pomyen Y, Calboli F C, Elliott P, Jarvelin M-R, Coin L J, MultiPhen:  
466 joint model of multiple phenotypes can increase discovery in GWAS, *PloS one*. 2012; 7: e34861.
- 467 9. Falconer D S, Mackay T F, Introduction to quantitative genetics (4th edn), *Trends in Genetics*.  
468 1996; 12: 280.
- 469 10. Wright S, Correlation and causation, *Journal of agricultural research*. 1921; 20: 557-585.
- 470 11. Gianola D, Sorensen D, Quantitative genetic models for describing simultaneous and recursive  
471 relationships between phenotypes, *Genetics*. 2004; 167: 1407-1424.
- 472 12. Varona L, Sorensen D, Thompson R, Analysis of Litter Size and Average Litter Weight in Pigs  
473 Using a Recursive Model, *Genetics*. 2007; 177: 1791.
- 474 13. Kumar S, Agrawal S, Disease-oriented Causal Networks, *Encyclopedia of Systems Biology*,  
475 Springer, 2013, pp. 593-594.
- 476 14. Schadt E E, Chapter 10 - Reconstructing Causal Network Models of Human Disease A2 -  
477 Lehner, Thomas, in: Miller B L, State M W (Eds.), *Genomics, Circuits, and Pathways in Clinical*  
478 *Neuropsychiatry*, Academic Press, San Diego, 2016, pp. 141-160.
- 479 15. Rosa G J, Valente B D, De Los Campos G, Wu X-L, Gianola D, Silva M A, Inferring causal  
480 phenotype networks using structural equation models, *Genetics Selection Evolution*. 2011; 43: 6.
- 481 16. Li R, Tsaih S-W, Shockley K, Stylianou I M, Wergedal J, Paigen B, Churchill G A, Structural  
482 model analysis of multiple quantitative traits, *PLoS genetics*. 2006; 2: e114.
- 483 17. Momen M, Mehrgardi A A, Sheikhy A, Esmailzadeh A, Fozzi M A, Kranis A, Valente B D,  
484 Rosa G J M, Gianola D, A predictive assessment of genetic correlations between traits in chickens  
485 using markers, *Genetics Selection Evolution*. 2017; 49: 16.
- 486 18. Kranis A, Gheyas A A, Boschiero C, Turner F, Yu L, Smith S, Talbot R, Pirani A, Brew F,  
487 Kaiser P, Development of a high density 600K SNP genotyping array for chicken, *BMC genomics*.  
488 2013; 14: 59.

- 489 19. Browning S R, Browning B L, Rapid and accurate haplotype phasing and missing-data  
490 inference for whole-genome association studies by use of localized haplotype clustering, *Am J*  
491 *Hum Genet.* 2007; 81.
- 492 20. Purcell S, Neale B, Todd-Brown K, Thomas L, Ferreira M A, Bender D, Maller J, Sklar P, De  
493 Bakker P I, Daly M J, PLINK: a tool set for whole-genome association and population-based  
494 linkage analyses, *The American Journal of Human Genetics.* 2007; 81: 559-575.
- 495 21. Listgarten J, Lippert C, Kadie C M, Davidson R I, Eskin E, Heckerman D, Improved linear  
496 mixed models for genome-wide association studies, *Nat Meth.* 2012; 9: 525-526.
- 497 22. Gianola D, Fariello M I, Naya H, Schön C-C, Genome-Wide Association Studies with a  
498 Genomic Relationship Matrix: A Case Study with Wheat and Arabidopsis, *G3: Genes, Genomes,*  
499 *Genetics.* 2016; 6: 3241-3256.
- 500 23. Kennedy B W, Quinton M, Van Arendonk J a M, Estimation of effects of single genes on  
501 quantitative traits, *Journal of Animal Science.* 1992; 70: 2000-2012.
- 502 24. Vanraden P, Efficient methods to compute genomic predictions, *J Dairy Sci.* 2008; 91: 4414 -  
503 4423.
- 504 25. Yang J, Benyamin B, Mcevoy B, Gordon S, Henders A, Nyholt D, Common SNPs explain a  
505 large proportion of the heritability for human height, *Nat Genet.* 2010; 42: 565 - 569.
- 506 26. Forni S, Aguilar I, Misztal I, Different genomic relationship matrices for single-step analysis  
507 using phenotypic, pedigree and genomic information, *Genet Sel Evol.* 2011; 43: 1.
- 508 27. Wu X L, Heringstad B, Gianola D, Bayesian structural equation models for inferring  
509 relationships between phenotypes: a review of methodology, identifiability, and applications,  
510 *Journal of Animal Breeding and Genetics.* 2010; 127: 3-15.
- 511 28. Jamrozik J, Schaeffer L, Alternative parameterizations of the multiple-trait random regression  
512 model for milk yield and somatic cell score via recursive links between phenotypes, 2011.
- 513 29. Pearl J, Causal inference in statistics: An overview, *Statistics surveys.* 2009; 3: 96-146.
- 514 30. Jiang G, Chakraborty A, Wang Z, Boustani M, Liu Y, Skaar T, Li L, New aQTL SNPs for the  
515 CYP2D6 identified by a novel mediation analysis of genome-wide SNP arrays, gene expression  
516 arrays, and CYP2D6 activity, *BioMed research international.* 2013; 2013.
- 517 31. Nock N, Zhang L, Evaluating aggregate effects of rare and common variants in the 1000  
518 Genomes Project exon sequencing data using latent variable structural equation modeling, in *BMC*  
519 *proceedings,* 2011, Vol. 5, BioMed Central, pp. S47.
- 520 32. Valente B D, Rosa G J, De Los Campos G, Gianola D, Silva M A, Searching for recursive  
521 causal structures in multivariate quantitative genetics mixed models, *Genetics.* 2010; 185: 633-  
522 644.
- 523 33. Henderson C, Quaas R, Multiple trait evaluation using relatives' records, *Journal of Animal*  
524 *Science.* 1976; 43: 1188-1197.
- 525 34. Valente B D, Rosa G J, Gianola D, Wu X-L, Weigel K, Is structural equation modeling  
526 advantageous for the genetic improvement of multiple traits?, *Genetics.* 2013; 194: 561-572.
- 527 35. Van Goor A, Bolek K J, Ashwell C M, Persia M E, Rothschild M F, Schmidt C J, Lamont S J,  
528 Identification of quantitative trait loci for body temperature, body weight, breast yield, and  
529 digestibility in an advanced intercross line of chickens under heat stress, *Genetics Selection*  
530 *Evolution.* 2015; 47: 96.
- 531 36. Sun Y, Zhao G, Liu R, Zheng M, Hu Y, Wu D, Zhang L, Li P, Wen J, The identification of 14  
532 new genes for meat quality traits in chicken using a genome-wide association study, *BMC*  
533 *Genomics.* 2013; 14: 458.

- 534 37. Gao H, Zhang T, Wu Y, Wu Y, Jiang L, Zhan J, Li J, Yang R, Multiple-trait genome-wide  
535 association study based on principal component analysis for residual covariance matrix, *Heredity*.  
536 2014; 113: 526-532.
- 537 38. Wu B, Pankow J S, Genome-wide association test of multiple continuous traits using imputed  
538 SNPs, *Statistics and its interface*. 2017; 10: 379.
- 539 39. Bellavia A, Valeri L, Decomposition of the total effect in the presence of multiple mediators  
540 and interactions, *American journal of epidemiology*. 2017.
- 541 40. Barfield R, Shen J, Just A C, Vokonas P S, Schwartz J, Baccarelli A A, Vanderweele T J, Lin  
542 X, Testing for the indirect effect under the null for genome-wide mediation analyses, *Genetic*  
543 *epidemiology*. 2017; 41: 824-833.
- 544 41. Mi X, Eskridge K, Wang D, Baenziger P S, Campbell B T, Gill K S, Dweikat I, Bovaird J,  
545 Regression-based multi-trait QTL mapping using a structural equation model, *Statistical*  
546 *applications in genetics and molecular biology*. 2010; 9.
- 547 42. Wang H, Van Eeuwijk F A, A New Method to Infer Causal Phenotype Networks Using QTL  
548 and Phenotypic Information, *PLOS ONE*. 2014; 9: e103997.

549

550

551

552



553 **Tables**

554

**Table 1. Model comparison criteria: logarithm of the restricted maximum likelihood function (log L), Akaike's information criteria (AIC), Schwarz Bayesian information criteria (BIC) to evaluate model fit for two MTM and four SEM models.**

| Model   | Maximum log L | -1/2 AIC  | -1/2 BIC  |
|---------|---------------|-----------|-----------|
| MTM-A   | -7093.480     | -7105.48  | -7142.436 |
| SEM-A75 | -7098.370     | -7110.415 | -7147.321 |
| SEM-A85 | -7095.188     | -7107.188 | -7144.143 |
| SEM-A95 | -7097.517     | -7109.517 | -7146.470 |
| MTM-G   | -6529.270     | -6541.276 | -6578.232 |
| SEM-G75 | -6537.391     | -6549.391 | -6586.34  |

A: pedigree-based relationship matrix, G: VanRaden's marker-based relationship matrix

555

556

557

558

559

560

561

562

563

564

565

566

**Table 2 Estimates of three causal structural coefficients ( $\lambda$ ) derived from four different structural models. BM: breast meat. BW: body weight. HHP: hen-house production. SEM-75: HPD > 0.75. SEM-G75: HPD > 0.75. SEM-A85: HPD > 0.85. SEM-A95: HPD > 0.95.**

| Path                                         | Structural Models |         |         |         |
|----------------------------------------------|-------------------|---------|---------|---------|
|                                              | SEM-A75           | SEM-G75 | SEM-A85 | SEM-A95 |
| $\lambda_{BM \rightarrow BW}(\lambda_{21})$  | 2.13              | 2.19    | 2.14    | 2.14    |
| $\lambda_{BM \rightarrow HHP}(\lambda_{31})$ | -0.17             | -0.28   | ***     | ***     |
| $\lambda_{BW \rightarrow HHP}(\lambda_{32})$ | -0.27             | -0.096  | -0.31   | ***     |

567

**Table 3. Six most significant SNPs selected according  $-\log_{10}$  (p-values) and their effects, using the full recursive SEM (SEM-A75) and MTM (MTM-A75).  $d_{S_j \rightarrow y(HHP)}$ ,  $ind_{S_j \rightarrow y(HHP)}$ ,  $T_{S_j \rightarrow y(HHP)}$  and  $MTM_{S_j \rightarrow y(HHP)}$ , represents, direct, indirect and overall from SEM and MTM effects of  $j$ -th SNP on HHP.**

|                               | CHR | SNP name        | candidate genes | $-\log_{10}$ (p-values)      |                                |                              |                                | Type of SNP effect           |                                |                              |                                |
|-------------------------------|-----|-----------------|-----------------|------------------------------|--------------------------------|------------------------------|--------------------------------|------------------------------|--------------------------------|------------------------------|--------------------------------|
|                               |     |                 |                 | $d_{S_j \rightarrow y(HHP)}$ | $ind_{S_j \rightarrow y(HHP)}$ | $T_{S_j \rightarrow y(HHP)}$ | $MTM_{S_j \rightarrow y(HHP)}$ | $d_{S_j \rightarrow y(HHP)}$ | $ind_{S_j \rightarrow y(HHP)}$ | $T_{S_j \rightarrow y(HHP)}$ | $MTM_{S_j \rightarrow y(HHP)}$ |
| Top SNPs for direct effects   | 14  | Gga_rs313620413 | GRIN2A          | <b>7.4242</b>                | 0.1499                         | 9.6599                       | 7.4525                         | -5.7827                      | -0.0498                        | -5.8326                      | -5.78511                       |
|                               | 7   | Gga_rs16591372  | OLA1            | <b>7.0868</b>                | 0.2220                         | 9.0119                       | 6.9783                         | -22.5681                     | 0.2983                         | -22.2698                     | -22.3520                       |
|                               | 3   | Gga_rs15390496  | EPHA7           | <b>7.0209</b>                | 0.2214                         | 8.6122                       | 7.0297                         | -22.4233                     | -0.2149                        | -22.6382                     | -22.4098                       |
|                               | 1   | Gga_rs314001234 | ----            | <b>7.0147</b>                | 1.1067                         | 9.0710                       | 7.1653                         | -26.6538                     | -0.9018                        | -27.5556                     | -26.9360                       |
|                               | 7   | Gga_rs315626061 | ----            | <b>6.8300</b>                | 0.3360                         | 8.9974                       | 6.9529                         | 5.1767                       | 0.0910                         | 5.26783                      | 5.22295                        |
|                               | 7   | Gga_rs316509306 | ----            | <b>6.8241</b>                | 0.3442                         | 8.9952                       | 6.9485                         | 5.1742                       | 0.0928                         | 5.267116                     | 5.22105                        |
| Top SNPs for indirect effects | 4   | Gga_rs316082590 | LOC422264       | 0.7137                       | <b>3.6868</b>                  | 0.4754                       | 0.5696                         | -1.2913                      | 0.4505                         | -0.84073                     | -1.07339                       |
|                               | 4   | Gga_rs313358833 | LOC422265       | 0.6449                       | <b>3.2345</b>                  | 0.4310                       | 0.5202                         | -1.2067                      | 0.4235                         | -0.78322                     | -1.01618                       |
|                               | 4   | Gga_rs314615897 | MAEA            | 0.1170                       | <b>2.9505</b>                  | 0.0474                       | 0.0387                         | -0.2799                      | 0.3853                         | 0.105456                     | -0.09807                       |
|                               | 1   | Gga_rs15301842  | ----            | 0.0393                       | <b>2.9408</b>                  | 0.1436                       | 0.0149                         | -0.1301                      | 0.5053                         | 0.375199                     | 0.050463                       |
|                               | 1   | Gga_rs314551852 | ----            | 0.0632                       | <b>2.8858</b>                  | 0.1100                       | 0.0065                         | -0.2038                      | 0.4994                         | 0.295514                     | -0.02218                       |
|                               | 1   | Gga_rs317379325 | ----            | 0.1599                       | <b>2.8473</b>                  | 0.0070                       | 0.0931                         | -0.4789                      | 0.5000                         | 0.021148                     | -0.29321                       |
| Overall effects               | 14  | Gga_rs313620413 | GRIN2A          | 7.4242                       | 0.1499                         | <b>9.6599</b>                | 7.4525                         | -5.7827                      | -0.0498                        | -5.83262                     | -5.7851                        |
|                               | 1   | Gga_rs314001234 | ----            | 7.0147                       | 1.1067                         | <b>9.0710</b>                | 7.1653                         | -26.653                      | -0.9018                        | -27.5556                     | -26.9360                       |
|                               | 7   | Gga_rs315626061 | ----            | 7.0868                       | 0.2220                         | <b>9.0119</b>                | 6.9783                         | -22.5681                     | 0.2983                         | -22.2698                     | -22.3520                       |
|                               | 7   | Gga_rs315626061 | ----            | 6.8300                       | 0.3360                         | <b>8.9974</b>                | 6.9529                         | 5.1767                       | 0.0910                         | 5.26783                      | 5.2229                         |
|                               | 7   | Gga_rs316509306 | ----            | 6.8241                       | 0.3442                         | <b>8.9952</b>                | 6.9485                         | 5.1742                       | 0.0928                         | 5.267116                     | 5.2210                         |
|                               | 7   | Gga_rs15850017  | ZNF385B         | 6.6582                       | 0.0499                         | <b>8.6397</b>                | 6.6176                         | -20.8591                     | -0.0718                        | -20.9310                     | -20.7681                       |
| MTM                           | 14  | Gga_rs313620413 | GRIN2A          | 7.4242                       | 0.1499                         | 9.6599                       | <b>7.4525</b>                  | -5.7827                      | -0.0498                        | -5.8326                      | -5.7851                        |
|                               | 1   | Gga_rs314001234 | ----            | 7.0147                       | 1.1067                         | 9.0710                       | <b>7.1653</b>                  | -26.6538                     | -0.9018                        | -27.5556                     | -26.936                        |
|                               | 3   | Gga_rs15390496  | EPHA7           | 7.0209                       | 0.2214                         | 8.6122                       | <b>7.0297</b>                  | -22.4233                     | -0.2149                        | -22.6382                     | -22.4098                       |
|                               | 7   | Gga_rs16591372  | OLA1            | 7.0868                       | 0.2220                         | 9.0119                       | <b>6.9783</b>                  | -22.5681                     | 0.2983                         | -22.2698                     | -22.352                        |
|                               | 7   | Gga_rs315626061 | ----            | 6.8300                       | 0.3360                         | 8.9974                       | <b>6.9529</b>                  | 5.1767                       | 0.0910                         | 5.26780                      | 5.2229                         |
|                               | 7   | Gga_rs316509306 | ----            | 6.8241                       | 0.3442                         | 8.9952                       | <b>6.9485</b>                  | 5.1742                       | 0.0928                         | 5.2671                       | 5.2210                         |

The bold values are  $-\log_{10}$  (corrected p-value) for each type of significant SNP effects categories.

569

## 570 Figures

571

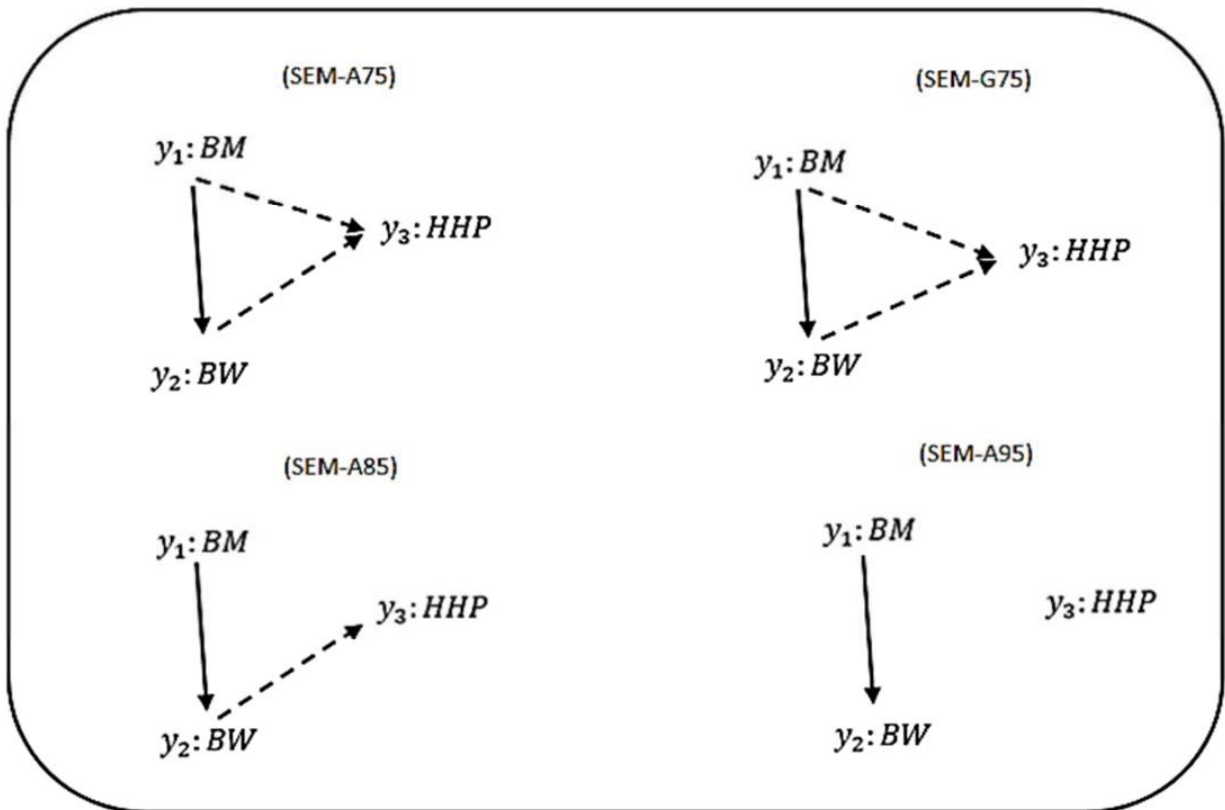

572

573 **Figure 1 Causal graphs inferred using the IC algorithm among three traits: breast meat**  
574 **(BM), body weight (BW) and hen-house production (HHP) in the chicken data.** SEM-A75 and  
575 SEM-G75 were the inferred fully recursive causal structures with HPD > 0.75 and corrected for  
576 genetic confounder using **A** (pedigree-based) and **G** (marker-based) matrices. SEM-A85 and SEM-  
577 A95 were obtained with HPD > 0.85 and HPD > 0.95, respectively, corrected with **A**. Arrows  
578 indicate direction of causal relationships. Dashed lines indicate negative coefficients, and the  
579 continuous arrows indicate positive coefficients.

580

581

582

583  
584  
585  
586  
587  
588

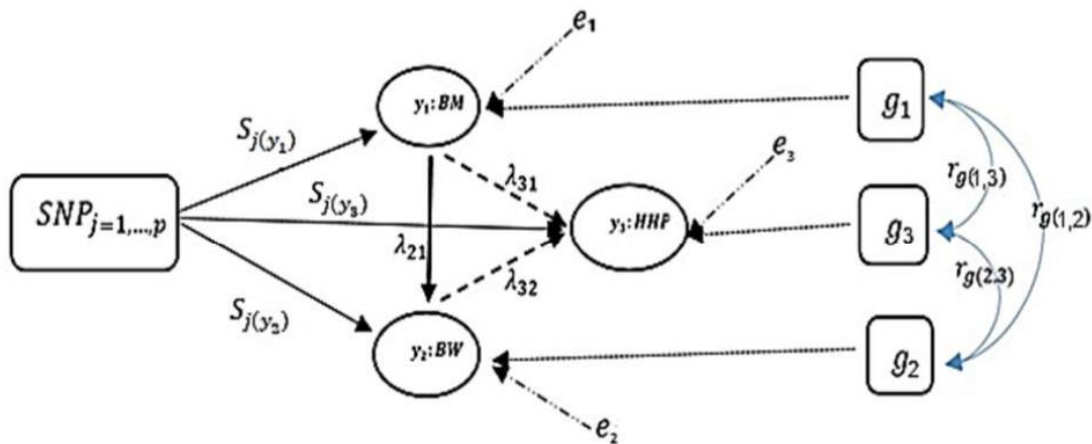

589

590 **Figure 2** A diagram for causal path analysis of SNP effects in a fully recursive structural  
591 **equation model for three traits,  $p$  exogenous independent SNP variables, and three**  
592 **correlated polygenic effects.** Arrows indicate the direction of causal effects and dashed lines  
593 represent associations among the three phenotypes. Genetic correlation between traits ( $r_g$ ),  
594 polygenic effects ( $g_l$ ), environmental effect on trait  $l$  ( $e_l$ ), effects of  $j$  th SNP on  $l$  th trait ( $S_{j(y_l)}$ ),  
595 and recursive effect of phenotype  $l'$  on phenotype  $l$  ( $\lambda_{l,l'}$ ).

596

597

598

599

600

601

602

603

604  
605  
606  
607  
608

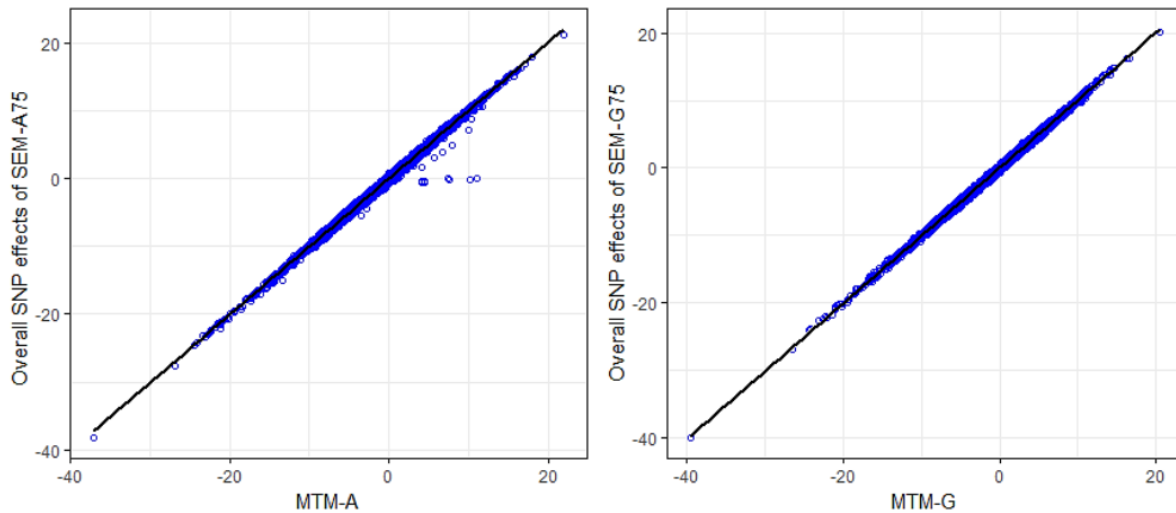

609  
610  
611  
612  
613  
614

**Figure 3 Comparison of multiple trait (MTM) and fully recursive overall SNP effects obtained with A (pedigree-based) and G (marker-based) from structural equation modeling (SEM)-based GWAS. Overall effects in SEM are the sum of all direct and indirect effects. HHP: hen-house egg production.**

615

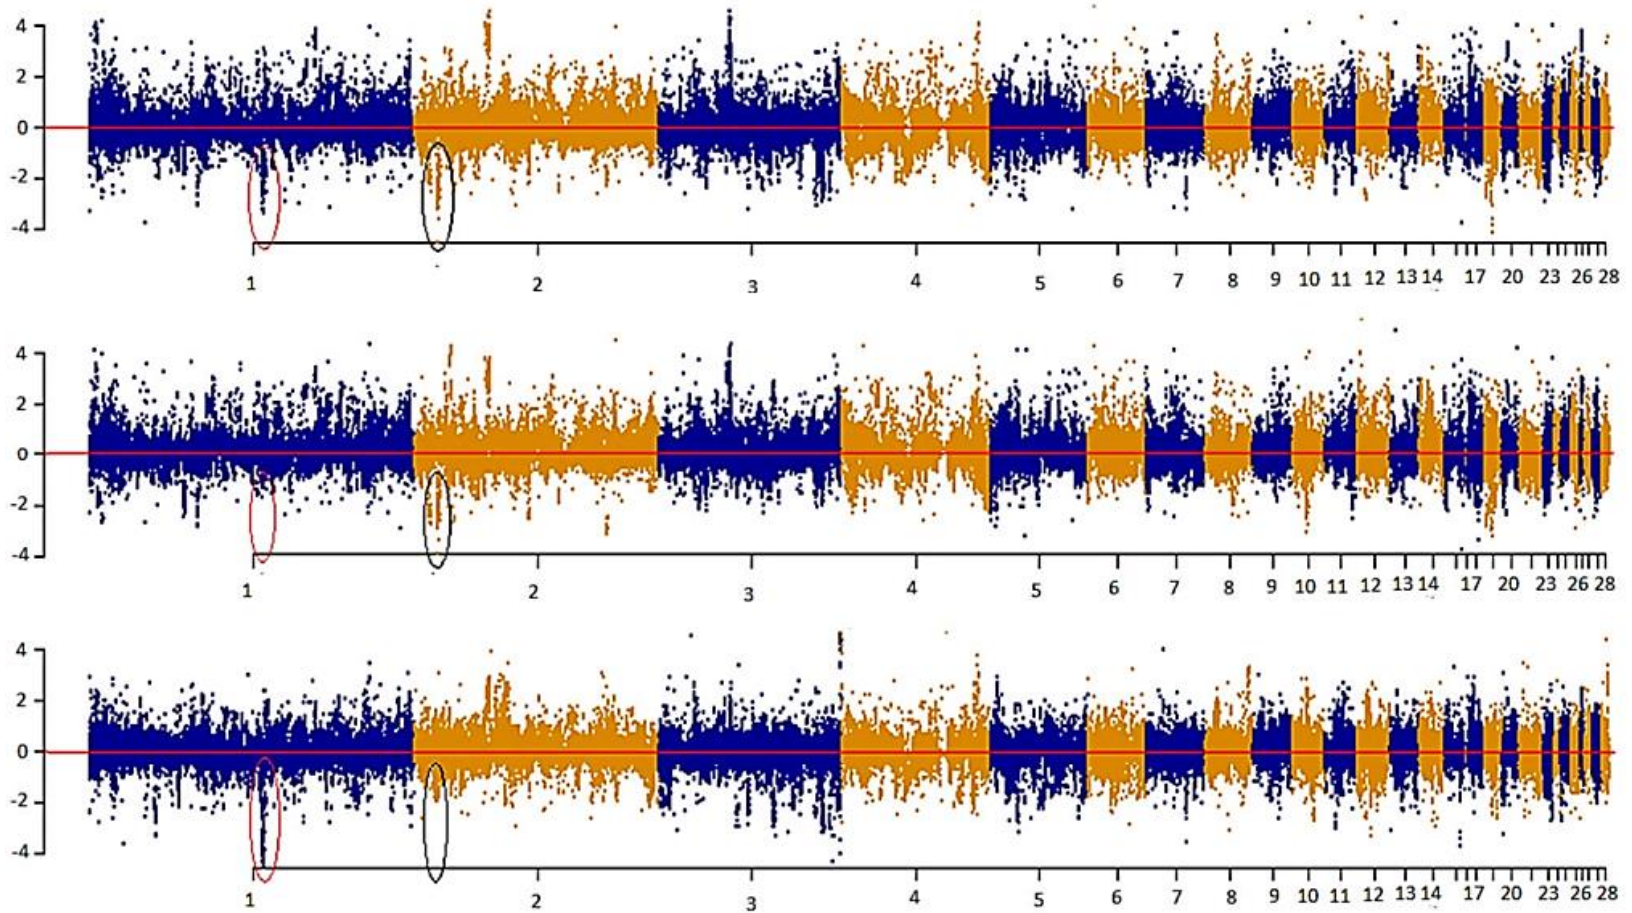

616

617 **Figure 4** Manhattan plot showing overall, direct, and indirect SNP effects using a full recursive model based on A matrix for  
618 **body weight (BW).**

619
